# Supplementary material
Source: PubMed Central journal article supplement (PMC7374068)
Supplement: 41580_2020_275_MOESM1_ESM.pdf [file 41580_2020_275_MOESM1_ESM.pdf]

# COVID-19 management in light of the circadian clock

---

*Sandipan Ray and Akhilesh B. Reddy*

<https://doi.org/10.1038/s41580-020-0275-3>

## Supplementary Figure 1. Circadian rhythms of druggable host factors that interact with SARS-CoV-2 proteins

(a)

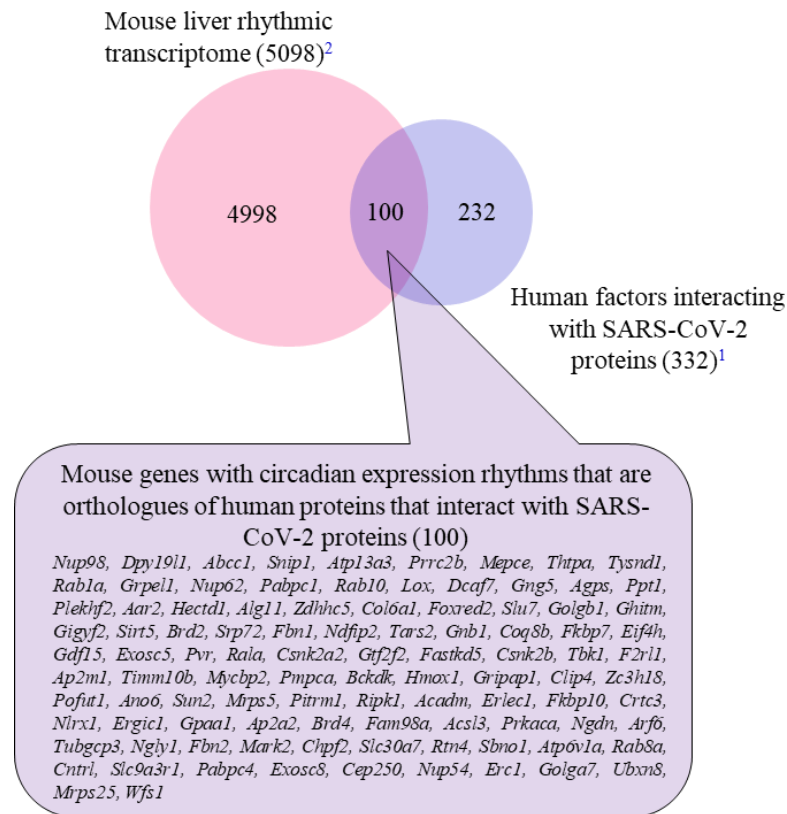

(a) **Circadian rhythms of host factors that interact with SARS-CoV-2.** We evaluated the circadian expression patterns of human proteins that are involved in high-confidence protein–protein interactions with SARS-CoV-2 proteins, as defined by Gordon *et al.*<sup>1</sup>, by comparing them with our recently published circadian mouse liver transcriptome data<sup>2</sup>. We have identified that 100 (out of 332) of these SARS-CoV-2 interacting factors exhibit 24-hour oscillation ( $Q < 0.1$ ) under constant condition.

(b)

| No. | Druggable human factor      | SARS-CoV-2-interacting protein | Circadian expression in mammalian organs or tissues                                                                                                                            |
|-----|-----------------------------|--------------------------------|--------------------------------------------------------------------------------------------------------------------------------------------------------------------------------|
| 1   | Alpha-galactosidase A (GLA) | Nsp14                          | Heart (JTK-Q = 0.0009), Lung (JTK-Q = 0.001), Brain stem (JTK-Q = 0.0094), Suprachiasmatic nucleus (JTK-Q = 0.06), Brown adipose tissue (JTK-Q = 0.073), Kidney (JTK-Q = 0.09) |

|    |                                                                |       |                                                                                                                                                         |
|----|----------------------------------------------------------------|-------|---------------------------------------------------------------------------------------------------------------------------------------------------------|
| 2  | Protein-lysine 6-oxidase (LOX)                                 | Orf8  | Pituitary (JTK-Q = 0.0014), Aorta (JTK-Q = 0.01), Kidney (JTK-Q = 0.018), White adipose tissue (JTK-Q = 0.074), Brown adipose tissue (JTK-Q = 0.09)     |
| 3  | ATP-binding cassette sub-family C member 1 (ABCC1)             | Orf9c | Muscle (JTK-Q = 0.001), Brown adipose tissue (JTK-Q = 0.0018), Hypothalamus (JTK-Q = 0.024), Lung (JTK-Q = 0.036), Heart (JTK-Q = 0.039)                |
| 4  | FK506 binding protein 10 (FKBP10)                              | Orf8  | Lung (JTK-Q = 0.0001), Brain stem (JTK-Q = 0.019), Adrenal gland (JTK-Q = 0.024), Suprachiasmatic nucleus (JTK-Q = 0.033), Distal colon (JTK-Q = 0.043) |
| 5  | Sigma non-opioid intracellular receptor 1 (SIGMAR1)            | Nsp6  | Liver (JTK-Q = 2.58e-05), White adipose tissue (JTK-Q = 0.023), Adrenal gland (JTK-Q = 0.029), Kidney (JTK-Q = 0.051)                                   |
| 6  | Sigma intracellular receptor 2 (TMEM97)                        | Orf9c | Liver (JTK-Q = 1.72e-05), Lung (JTK-Q = 0.014), Kidney (JTK-Q = 0.071), Adrenal gland (JTK-Q = 0.083)                                                   |
| 7  | Valosin containing protein (VCP)                               | Orf10 | Liver (JTK-Q = 0.009), Lung (JTK-Q = 0.03), Kidney (JTK-Q = 0.043), Suprachiasmatic nucleus (JTK-Q = 0.075)                                             |
| 8  | La-related protein 1 (LARP1)                                   | N     | Liver (JTK-Q = 8.70e-07), Lung (JTK-Q = 0.0048), Heart (JTK-Q = 0.039), Suprachiasmatic nucleus (JTK-Q = 0.064)                                         |
| 9  | Catechol O-methyltransferase (COMT)                            | Nsp7  | Liver (JTK-Q = 4.23e-06), Kidney (JTK-Q = 0.0002), Aorta (JTK-Q = 0.0016), White adipose tissue (JTK-Q = 0.028)                                         |
| 10 | Bromodomain-containing protein 2 (BRD2)                        | E     | Aorta (JTK-Q = 0.006), Brown adipose tissue (JTK-Q = 0.006), Lung (JTK-Q = 0.02)                                                                        |
| 11 | Receptor-interacting serine/threonine-protein kinase 1 (RIPK1) | Nsp12 | Kidney (JTK-Q = 0.0086), Liver (JTK-Q = 0.011), Heart (JTK-Q = 0.068)                                                                                   |
| 12 | Procollagen-lysine,2-oxoglutarate 5-dioxygenase 2 (PLOD2)      | Orf8  | Kidney (JTK-Q = 0.003), Heart (JTK-Q = 0.018), Adrenal gland (JTK-Q = 0.024)                                                                            |
| 13 | FK506 binding protein 7 (FKBP7)                                | Orf8  | Kidney (JTK-Q = 0.027), Liver (JTK-Q = 0.046), Aorta (JTK-Q = 0.08)                                                                                     |

|    |                                                                |       |                                                                                             |
|----|----------------------------------------------------------------|-------|---------------------------------------------------------------------------------------------|
| 14 | cAMP-dependent protein kinase catalytic subunit alpha (PRKACA) | Nsp13 | Liver (JTK-Q = 0.00039), Suprachiasmatic nucleus (JTK-Q = 0.064), Kidney (JTK-Q = 0.089)    |
| 15 | Solute carrier family 6 - member 15 (SLC6A15)                  | Nsp6  | Suprachiasmatic nucleus (JTK-Q = 0.02), Adrenal gland (JTK-Q = 0.059), Lung (JTK-Q = 0.073) |
| 16 | Solute carrier family 1 (SLC1A3)                               | M     | Lung (JTK-Q = 0.0028), Brown adipose tissue (JTK-Q = 0.037), Aorta (JTK-Q = 0.056)          |
| 17 | Procollagen-lysine,2-oxoglutarate 5-dioxygenase 1 (PLOD1)      | Orf8  | Liver (JTK-Q = 0.0008), Lung (JTK-Q = 0.001), Brown adipose tissue (JTK-Q = 0.086)          |
| 18 | V-type proton ATPase subunit S1 (ATP6AP1)                      | Nsp6  | Liver (JTK-Q = 0.0006), Suprachiasmatic nucleus (JTK-Q = 0.0048)                            |
| 19 | Casein kinase II subunit alpha (CSNK2A2)                       | N     | Liver (JTK-Q = 0.0047), Brown adipose tissue (JTK-Q = 0.03)                                 |
| 20 | Inosine-5'-monophosphate dehydrogenase 2 (IMPDH2)              | Nsp14 | Liver (JTK-Q = 0.055), Lung (JTK-Q = 0.061)                                                 |
| 21 | MAP/microtubule affinity-regulating kinase 3 (MARK3)           | Orf9b | Suprachiasmatic nucleus (JTK-Q = 0.0048), Liver (JTK-Q = 0.0082)                            |
| 22 | V-ATPase subunit A (ATP6V1A)                                   | M     | Suprachiasmatic nucleus (JTK-Q = 0.022)                                                     |
| 23 | Bromodomain-containing protein 4 (BRD4)                        | E     | Liver (JTK-Q = 0.05)                                                                        |
| 24 | Deoxycytidine-triphosphatase 1 (DCTPP1)                        | Orf9b | Liver (JTK-Q = 4.8e-06)                                                                     |
| 25 | DNA (cytosine-5)-methyltransferase 1 (DNMT1)                   | Orf8  | Adrenal gland (JTK-Q = 0.024)                                                               |
| 26 | Proteinase-activated receptor 2 (F2RL1)                        | Orf9c | Aorta (JTK-Q = 0.093)                                                                       |
| 27 | Histone deacetylase 2 (HDAC2)                                  | Nsp5  | Kidney (JTK-Q = 0.085)                                                                      |
| 28 | MAP/microtubule affinity-regulating kinase 2 (MARK2)           | Orf9b | Liver (JTK-Q = 0.095)                                                                       |

|    |                                             |       |                          |
|----|---------------------------------------------|-------|--------------------------|
| 29 | Serine/threonine-protein kinase TBK1 (TBK1) | Nsp13 | Liver (JTK-Q = 1.03e-05) |
| 30 | FK506-binding protein 15 (FKBP15)           | Nsp2  | Liver (JTK-Q = 0.006)    |

**(b) Circadian expression of potential drug targets of the SARS-CoV-2-interacting proteins.** We analysed the daily rhythmicity of the druggable human factors that interact with SARS-CoV-2-proteins<sup>1</sup>. We investigated their rhythmic expression patterns using the Circadian Expression Profiles Database (CircaDB; <http://circadb.hogeneschlab.org/>), which is a comprehensive portal allowing access to the expression profiles of almost all mammalian genes on a circadian time scale<sup>3</sup>. We observed that the majority of these druggable human factors that are targets for FDA-approved drugs or compounds in clinical and preclinical trials (see Supplementary Table 4 and Supplementary Table 6 in REF.<sup>1</sup>), exhibit robust 24-hour oscillation (Period 24±3 h, JTK Q < 0.1) in one or multiple organs (or tissues) in mice. Importantly, the mouse model of SARS-CoV-2 infection is emerging as a very convenient tool for studying transmission and pathogenesis of this novel respiratory pathogen, and could also be useful in evaluating COVID-19 therapeutics<sup>4-6</sup>.

#### References:

1. Gordon, D. E. *et al.* A SARS-CoV-2 protein interaction map reveals targets for drug repurposing. *Nature* <https://doi.org/10.1038/s41586-020-2286-9> (2020).
2. Ray, S. *et al.* Circadian rhythms in the absence of the clock gene Bmal1. *Science* **367**, 800–806 (2020).
3. Pizarro, A., Hayer, K., Lahens, N. F. & Hogenesch, J. B. CircaDB: a database of mammalian circadian gene expression profiles. *Nucleic Acids Res* **41**, D1009–D1013 (2013).
4. Bao, L. *et al.* The pathogenicity of SARS-CoV-2 in hACE2 transgenic mice. *Nature* <https://doi:10.1038/s41586-020-2312-y> (2020).
5. Hassan, A. O. *et al.* A SARS-CoV-2 infection model in mice demonstrates protection by neutralizing antibodies. *Cell* <https://doi:10.1016/j.cell.2020.06.011> (2020).
6. Sun, S.-H. *et al.* A mouse model of SARS-CoV-2 infection and pathogenesis. *Cell Host Microbe*. **28**, 124-133 (2020).
